# Supplementary material for: Microarray profiling of lung long non-coding RNAs and mRNAs in lipopolysaccharide-induced acute lung injury mouse model
Source: Oxford University Press journal article supplement (doi:10.1042/bsr20181634), 2019-04-01
Supplement: bsr-2018-1634_supp.pdf [file bsr-2018-1634_supp.pdf]

**Supplementary Table 1. The primer sequences of validated LncRNAs in this study**

| <b>LncRNA seqname</b> | <b>Associated_protein_name</b>                           | <b>Forward (5'-3')</b>   | <b>Reverse (5'-3')</b>  |
|-----------------------|----------------------------------------------------------|--------------------------|-------------------------|
| ENSMUST00000149944    | formyl peptide receptor 2                                | ACAGGAACCGAAGAGTGTAAGA   | CTCCAGGAATTCATTGAGAGGA  |
| ENSMUST00000152323    | angiotensin II, type I receptor-associated protein       | GATTGGACCTGGTGTGCTGAGT   | CCACGAATCTTCTGCCTACT    |
| ENSMUST00000170214    | leucine zipper transcription factor-like 1               | TTCTGCTTTGGTTTAGACTTCC   | CATCCTTTTGC GTTAGTGAGTG |
| uc009lwr.1            | lipoprotein lipase                                       | GAAAACAAAATGGGACACCG     | GGAAACTGATTTCTGCTCTGG   |
| ENSMUST00000016031    | histidine ammonia lyase                                  | TGGTGATTGAAGGTGATGTGAT   | TCCCTGTTCTTTCTTTGATGAT  |
| ENSMUST00000176035    | archaelysin family metallopeptidase 1                    | AAGGGAGACATTTGAGAAGGAA   | TTCTGTCACTGAGACTCGCTTT  |
| ENSMUST00000146390    | somatostatin receptor 2                                  | GCGACAGTAAGCAGGACAAA     | CGGACAAGCCAGACTCAAA     |
| NR_033299             | RAR-related orphan receptor alpha                        | TTGTGATGTAAATGGTGCCC     | GGTGTTTGTGGTAGGAGGTGTA  |
| uc007pvx.2            | cytidine monophospho-N-acetylneuraminic acid hydroxylase | GGCAGAAGTCGGTCCTCTATTC   | AAGTACCCAGCAAACGGACAGT  |
| ENSMUST00000148855    | kynureninase (L-kynurenine hydrolase)                    | ATCTTAAATTTTCAGGTTAGTGGG | GAAAGACCTCTAAACTGGCG    |
